# Supplementary material for: Initial PET performance evaluation of a preclinical insert for PET/MRI with digital SiPM technology
Source: PubMed Central journal article supplement (PMC5362057; doi:10.1088/0031-9155/61/7/2851), 2016-03-17
Supplement: NIHMS71209-supplement-Supplementary_material.pdf [file NIHMS71209-supplement-Supplementary_material.pdf]

# **Initial PET Performance Evaluation of a Preclinical Insert for PET/MRI with Digital SiPM Technology**

Supplemental data

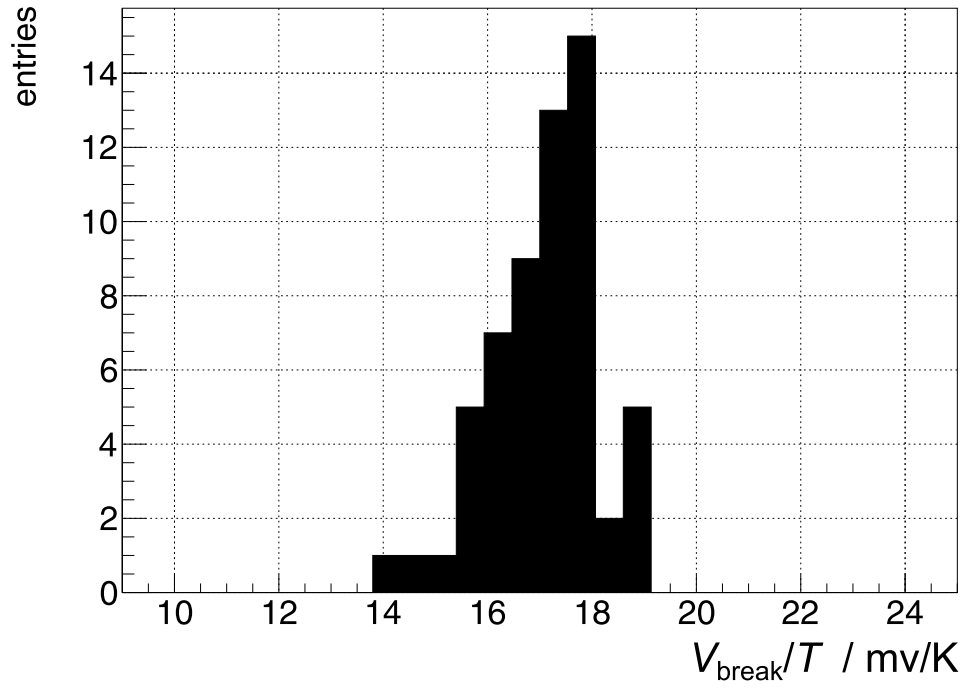

**Figure S1.** Histogram of the dependence of the breakdown voltage on temperature of all tiles of the system, except for one tile with a faulty temperature sensor.

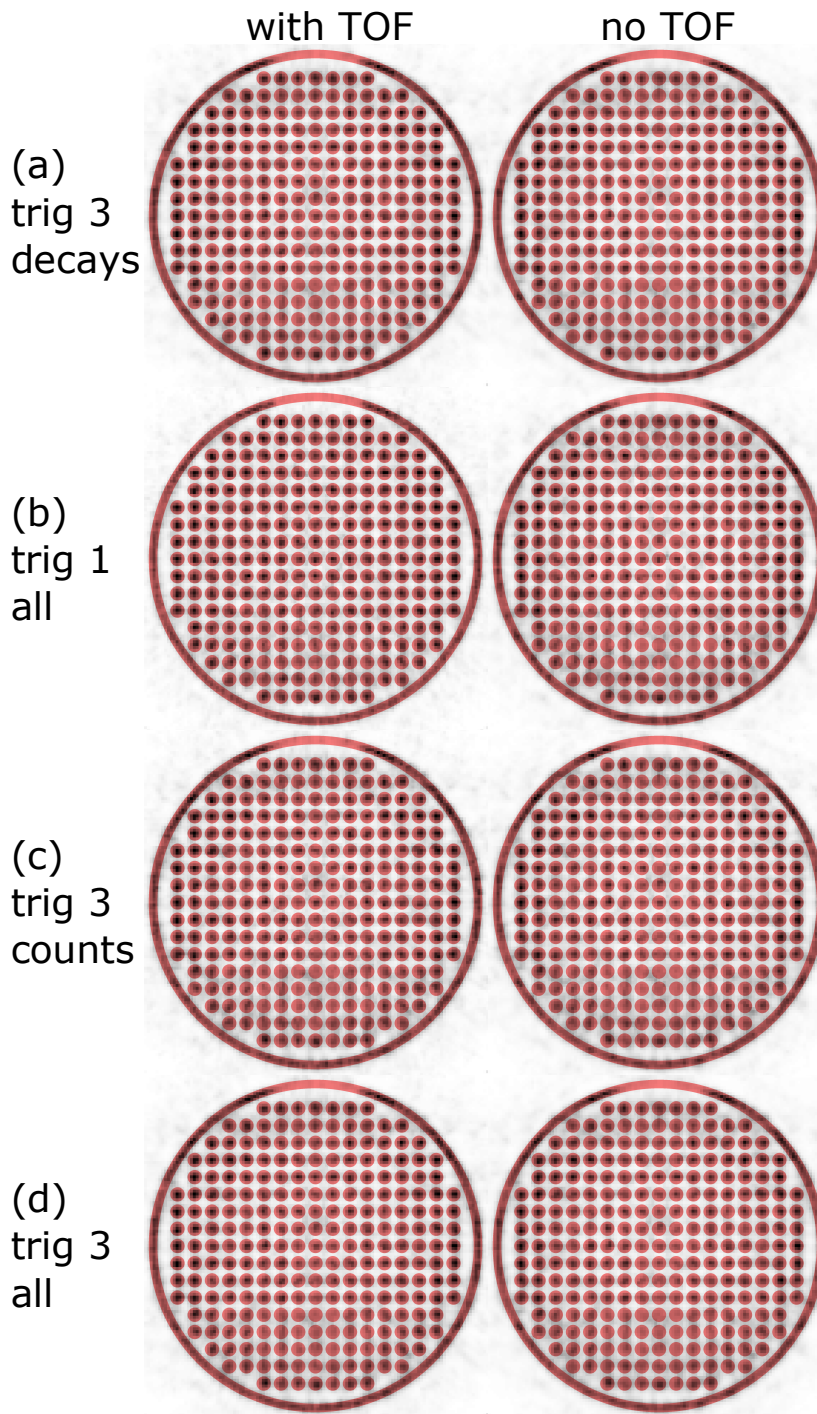

**Figure S2.** Transversal slices through the reconstructed rabbit-sized phantom as shown in ???. The signal region used for the signal-to-background evaluation is indicated in transparent red.

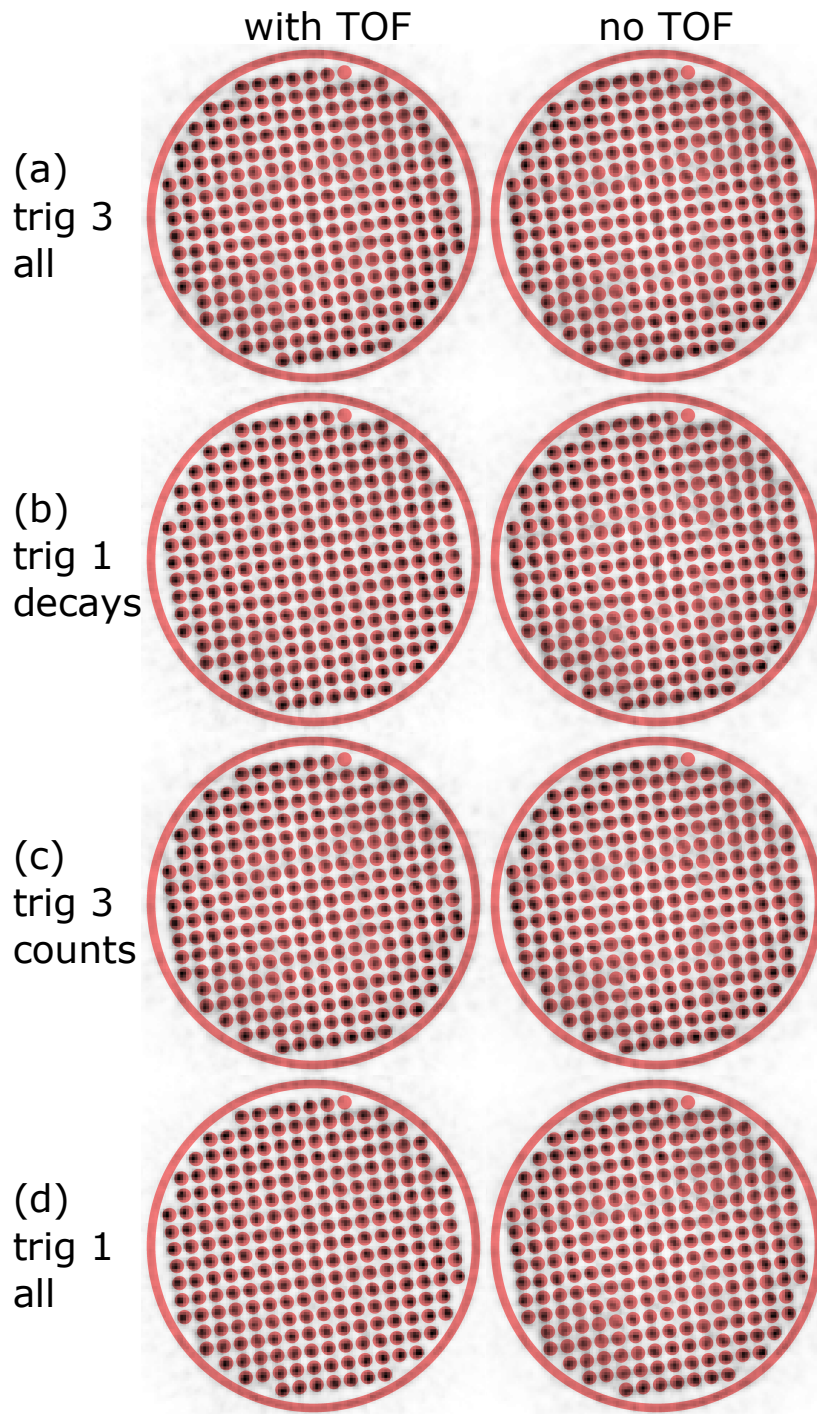

**Figure S3.** Transversal slices through the reconstructed rabbit-sized phantom measured in the tilted position as shown in ???. The signal region used for the signal-to-background evaluation is indicated in transparent red.

Table S1: All measurements performed with the 5  $^{22}\text{Na}$  point like sources (distribution and activities listed in ?? and constant  $V_{\text{bias}}$ . A measurement id is used to identify a specific measurement (meas.). The measurement parameters: cooling temperature ( $T_{\text{C}}$ ), overvoltage ( $V_{\text{ov}}$ ), trigger scheme (trig), validation scheme (val) and the used energy window (EW) are stated for each evaluation of a measurement. The energy resolution and CRT are stated as FWHM and the sensitivity is calculated from the ratio of the prompt rate and the activity of the point sources corrected for the branching ratio of the  $^{22}\text{Na}$   $\beta^+$  decay of 0.906

| meas. | $T_{\text{C}}$ | system $T_{\text{op}}$ | $V_{\text{ov}}$ | trig | val  | EW | $\Delta E/E$ | CRT     | sens.  |
|-------|----------------|------------------------|-----------------|------|------|----|--------------|---------|--------|
| 1     | -5 °C          | 4.48 ± 1.45 °C         | 2.5 V           | 1    | 17ph | NE | 12.45 %      | 258 ps  | 0.66 % |
| 2     | -5 °C          | 4.48 ± 1.45 °C         | 2.5 V           | 1    | 17ph | WE | 12.47 %      | 282 ps  | 1.43 % |
| 3     | -5 °C          | 4.62 ± 1.47 °C         | 2.8 V           | 1    | 17ph | NE | 12.74 %      | 259 ps  | 0.56 % |
| 4     | -5 °C          | 4.62 ± 1.47 °C         | 2.8 V           | 1    | 17ph | WE | 12.75 %      | 286 ps  | 1.27 % |
| 5     | -5 °C          | 4.73 ± 1.48 °C         | 2.9 V           | 1    | 17ph | NE | 13.86 %      | 262 ps  | 0.48 % |
| 6     | -5 °C          | 4.73 ± 1.48 °C         | 2.9 V           | 1    | 17ph | WE | 13.92 %      | 295 ps  | 1.21 % |
| 7     | -5 °C          | 3.28 ± 1.17 °C         | 2.5 V           | 2    | 17ph | NE | 12.39 %      | 432 ps  | 1.13 % |
| 8     | -5 °C          | 3.28 ± 1.17 °C         | 2.5 V           | 2    | 17ph | WE | 12.40 %      | 481 ps  | 2.38 % |
| 9     | -5 °C          | 3.28 ± 1.16 °C         | 2.5 V           | 2    | 37ph | NE | 12.40 %      | 429 ps  | 1.03 % |
| 10    | -5 °C          | 3.28 ± 1.16 °C         | 2.5 V           | 2    | 37ph | WE | 12.42 %      | 472 ps  | 1.99 % |
| 11    | -5 °C          | 3.21 ± 1.15 °C         | 2.5 V           | 2    | 52ph | NE | 12.35 %      | 454 ps  | 0.78 % |
| 12    | -5 °C          | 3.21 ± 1.15 °C         | 2.5 V           | 2    | 52ph | WE | 12.36 %      | 489 ps  | 1.36 % |
| 13    | -5 °C          | 3.35 ± 1.21 °C         | 2.8 V           | 2    | 17ph | NE | 12.32 %      | 418 ps  | 1.10 % |
| 14    | -5 °C          | 3.35 ± 1.21 °C         | 2.8 V           | 2    | 17ph | WE | 12.34 %      | 467 ps  | 2.32 % |
| 15    | -5 °C          | 3.41 ± 1.20 °C         | 2.9 V           | 2    | 17ph | NE | 12.31 %      | 415 ps  | 1.07 % |
| 16    | -5 °C          | 3.41 ± 1.20 °C         | 2.9 V           | 2    | 17ph | WE | 12.33 %      | 463 ps  | 2.27 % |
| 17    | -5 °C          | 3.53 ± 1.16 °C         | 3 V             | 2    | 17ph | NE | 14.10 %      | 416 ps  | 0.93 % |
| 18    | -5 °C          | 3.53 ± 1.16 °C         | 3 V             | 2    | 17ph | WE | 14.10 %      | 467 ps  | 2.20 % |
| 19    | -5 °C          | 3.34 ± 1.18 °C         | 2.5 V           | 3    | 17ph | NE | 12.39 %      | 538 ps  | 1.14 % |
| 20    | -5 °C          | 3.34 ± 1.18 °C         | 2.5 V           | 3    | 17ph | WE | 12.41 %      | 598 ps  | 2.38 % |
| 21    | -5 °C          | 3.17 ± 1.15 °C         | 2.5 V           | 4    | 17ph | NE | 12.50 %      | 1241 ps | 1.16 % |
| 22    | -5 °C          | 3.17 ± 1.15 °C         | 2.5 V           | 4    | 17ph | WE | 12.55 %      | 1394 ps | 2.43 % |
| 23    | 5 °C           | 13.41 ± 1.32 °C        | 2.5 V           | 1    | 17ph | NE | 12.81 %      | 272 ps  | 0.54 % |
| 24    | 5 °C           | 13.41 ± 1.32 °C        | 2.5 V           | 1    | 17ph | WE | 12.72 %      | 298 ps  | 0.80 % |
| 25    | 5 °C           | 11.67 ± 1.05 °C        | 2.5 V           | 2    | 17ph | NE | 12.52 %      | 440 ps  | 1.10 % |
| 26    | 5 °C           | 11.67 ± 1.05 °C        | 2.5 V           | 2    | 17ph | WE | 12.56 %      | 490 ps  | 2.31 % |
| 27    | 5 °C           | 11.67 ± 1.06 °C        | 2.5 V           | 2    | 37ph | NE | 12.55 %      | 437 ps  | 0.97 % |
| 28    | 5 °C           | 11.67 ± 1.06 °C        | 2.5 V           | 2    | 37ph | WE | 12.57 %      | 480 ps  | 1.87 % |
| 29    | 5 °C           | 11.67 ± 1.06 °C        | 2.5 V           | 2    | 52ph | NE | 12.58 %      | 436 ps  | 0.73 % |
| 30    | 5 °C           | 11.67 ± 1.06 °C        | 2.5 V           | 2    | 52ph | WE | 12.59 %      | 476 ps  | 1.32 % |
| 31    | 5 °C           | 11.67 ± 1.06 °C        | 2.5 V           | 3    | 17ph | NE | 12.65 %      | 552 ps  | 1.20 % |
| 32    | 5 °C           | 11.67 ± 1.06 °C        | 2.5 V           | 3    | 17ph | WE | 12.57 %      | 605 ps  | 2.33 % |
| 33    | 5 °C           | 11.51 ± 1.03 °C        | 2.5 V           | 4    | 17ph | NE | 12.74 %      | 1268 ps | 1.23 % |
| 34    | 5 °C           | 11.51 ± 1.03 °C        | 2.5 V           | 4    | 17ph | WE | 12.70 %      | 1399 ps | 2.39 % |
| 35    | 15 °C          | 21.03 ± 1.06 °C        | 2.5 V           | 2    | 17ph | NE | 12.75 %      | 450 ps  | 1.00 % |

continued on next page

Table S1 – continued from previous page

| meas. | $T_C$ | system $T_{op}$ | $V_{ov}$ | trig | val  | EW | $\Delta E/E$ | CRT     | sens.  |
|-------|-------|-----------------|----------|------|------|----|--------------|---------|--------|
| 36    | 15 °C | 21.03 ± 1.06 °C | 2.5 V    | 2    | 17ph | WE | 12.75 %      | 499 ps  | 2.08 % |
| 37    | 15 °C | 21.30 ± 1.10 °C | 2.5 V    | 2    | 37ph | NE | 12.74 %      | 451 ps  | 0.84 % |
| 38    | 15 °C | 21.30 ± 1.10 °C | 2.5 V    | 2    | 37ph | WE | 12.78 %      | 497 ps  | 1.60 % |
| 39    | 15 °C | 21.28 ± 1.10 °C | 2.5 V    | 2    | 52ph | NE | 12.81 %      | 450 ps  | 0.61 % |
| 40    | 15 °C | 21.28 ± 1.10 °C | 2.5 V    | 2    | 52ph | WE | 12.82 %      | 492 ps  | 1.08 % |
| 41    | 15 °C | 21.18 ± 1.09 °C | 2.8 V    | 2    | 17ph | NE | 12.63 %      | 442 ps  | 0.92 % |
| 42    | 15 °C | 21.18 ± 1.09 °C | 2.8 V    | 2    | 17ph | WE | 12.65 %      | 497 ps  | 1.94 % |
| 43    | 15 °C | 21.40 ± 1.13 °C | 2.8 V    | 2    | 37ph | NE | 12.64 %      | 436 ps  | 0.86 % |
| 44    | 15 °C | 21.40 ± 1.13 °C | 2.8 V    | 2    | 37ph | WE | 12.66 %      | 484 ps  | 1.67 % |
| 45    | 15 °C | 21.36 ± 1.11 °C | 2.8 V    | 2    | 52ph | NE | 12.68 %      | 434 ps  | 0.67 % |
| 46    | 15 °C | 21.36 ± 1.11 °C | 2.8 V    | 2    | 52ph | WE | 12.71 %      | 476 ps  | 1.22 % |
| 47    | 15 °C | 21.24 ± 1.10 °C | 2.9 V    | 2    | 17ph | NE | 12.62 %      | 440 ps  | 0.90 % |
| 48    | 15 °C | 21.24 ± 1.10 °C | 2.9 V    | 2    | 17ph | WE | 12.64 %      | 495 ps  | 1.90 % |
| 49    | 15 °C | 21.41 ± 1.13 °C | 2.9 V    | 2    | 37ph | NE | 12.63 %      | 435 ps  | 0.86 % |
| 50    | 15 °C | 21.41 ± 1.13 °C | 2.9 V    | 2    | 37ph | WE | 12.65 %      | 482 ps  | 1.68 % |
| 51    | 15 °C | 21.40 ± 1.12 °C | 2.9 V    | 2    | 52ph | NE | 12.64 %      | 430 ps  | 0.69 % |
| 52    | 15 °C | 21.40 ± 1.12 °C | 2.9 V    | 2    | 52ph | WE | 12.66 %      | 472 ps  | 1.26 % |
| 53    | 15 °C | 21.31 ± 1.12 °C | 3 V      | 2    | 17ph | NE | 12.60 %      | 439 ps  | 0.87 % |
| 54    | 15 °C | 21.31 ± 1.12 °C | 3 V      | 2    | 17ph | WE | 12.62 %      | 495 ps  | 1.85 % |
| 55    | 15 °C | 21.47 ± 1.14 °C | 3 V      | 2    | 37ph | NE | 12.60 %      | 433 ps  | 0.85 % |
| 56    | 15 °C | 21.47 ± 1.14 °C | 3 V      | 2    | 37ph | WE | 12.62 %      | 481 ps  | 1.68 % |
| 57    | 15 °C | 21.47 ± 1.13 °C | 3 V      | 2    | 52ph | NE | 12.62 %      | 425 ps  | 0.70 % |
| 58    | 15 °C | 21.47 ± 1.13 °C | 3 V      | 2    | 52ph | WE | 12.64 %      | 470 ps  | 1.29 % |
| 59    | 15 °C | 21.22 ± 1.07 °C | 2.5 V    | 3    | 17ph | NE | 12.74 %      | 562 ps  | 1.02 % |
| 60    | 15 °C | 21.22 ± 1.07 °C | 2.5 V    | 3    | 17ph | WE | 12.76 %      | 632 ps  | 2.14 % |
| 61    | 15 °C | 21.25 ± 1.07 °C | 2.8 V    | 3    | 17ph | NE | 12.64 %      | 544 ps  | 0.99 % |
| 62    | 15 °C | 21.25 ± 1.07 °C | 2.8 V    | 3    | 17ph | WE | 12.67 %      | 613 ps  | 2.09 % |
| 63    | 15 °C | 21.29 ± 1.08 °C | 2.9 V    | 3    | 17ph | NE | 12.62 %      | 540 ps  | 0.97 % |
| 64    | 15 °C | 21.29 ± 1.08 °C | 2.9 V    | 3    | 17ph | WE | 12.65 %      | 608 ps  | 2.06 % |
| 65    | 15 °C | 21.33 ± 1.09 °C | 3 V      | 3    | 17ph | NE | 12.60 %      | 537 ps  | 0.95 % |
| 66    | 15 °C | 21.33 ± 1.09 °C | 3 V      | 3    | 17ph | WE | 12.62 %      | 604 ps  | 2.02 % |
| 67    | 15 °C | 20.60 ± 0.95 °C | 2.5 V    | 4    | 17ph | NE | 12.85 %      | 1300 ps | 1.11 % |
| 68    | 15 °C | 20.60 ± 0.95 °C | 2.5 V    | 4    | 17ph | WE | 12.88 %      | 1469 ps | 2.34 % |
| 69    | 15 °C | 20.66 ± 0.97 °C | 2.8 V    | 4    | 17ph | NE | 12.75 %      | 1234 ps | 1.12 % |
| 70    | 15 °C | 20.66 ± 0.97 °C | 2.8 V    | 4    | 17ph | WE | 12.78 %      | 1399 ps | 2.36 % |
| 71    | 15 °C | 20.73 ± 0.99 °C | 2.9 V    | 4    | 17ph | NE | 12.73 %      | 1214 ps | 1.12 % |
| 72    | 15 °C | 20.73 ± 0.99 °C | 2.9 V    | 4    | 17ph | WE | 12.76 %      | 1375 ps | 2.37 % |
| 73    | 15 °C | 20.79 ± 0.99 °C | 3 V      | 4    | 17ph | NE | 12.69 %      | 1189 ps | 1.11 % |
| 74    | 15 °C | 20.79 ± 0.99 °C | 3 V      | 4    | 17ph | WE | 12.72 %      | 1344 ps | 2.36 % |

Table S2: All measurements performed with the 5  $^{22}\text{Na}$  point like sources (distribution and activities listed in ?? and constant  $V_{\text{ov}}$ . A measurement id is used to identify a specific measurement (meas.). The measurement parameters: cooling temperature ( $T_{\text{C}}$ ), system operating temperature ( $T_{\text{op}}$ ), overvoltage ( $V_{\text{ov}}$ ), trigger scheme (trig), validation scheme (val) and the used energy window (EW) are stated for each evaluation of a measurement. The energy resolution and CRT are stated as FWHM and the sensitivity is calculated from the ratio of the prompt rate and the activity of the point sources corrected for the branching ratio of the  $^{22}\text{Na}$   $\beta^+$  decay of 0.906

| meas. | $T_{\text{C}}$ | system $T_{\text{op}}$ | $V_{\text{ov}}$ | trig | val  | EW | $\Delta E/E$ | CRT     | sens.  |
|-------|----------------|------------------------|-----------------|------|------|----|--------------|---------|--------|
| 1     | -5 °C          | 4.86 ± 1.42 °C         | 2.5 V           | 1    | 17ph | NE | 12.62 %      | 262 ps  | 0.65 % |
| 2     | -5 °C          | 4.86 ± 1.42 °C         | 2.5 V           | 1    | 17ph | WE | 12.62 %      | 288 ps  | 1.40 % |
| 3     | -5 °C          | 4.18 ± 1.27 °C         | 2.5 V           | 3    | 17ph | NE | 12.57 %      | 576 ps  | 1.03 % |
| 4     | -5 °C          | 4.18 ± 1.27 °C         | 2.5 V           | 3    | 17ph | WE | 12.57 %      | 638 ps  | 2.15 % |
| 5     | -5 °C          | 3.98 ± 1.24 °C         | 2.5 V           | 4    | 17ph | NE | 12.69 %      | 1336 ps | 1.04 % |
| 6     | -5 °C          | 3.98 ± 1.24 °C         | 2.5 V           | 4    | 17ph | WE | 12.71 %      | 1496 ps | 2.18 % |
| 7     | 0 °C           | 9.24 ± 1.44 °C         | 2.5 V           | 1    | 17ph | NE | 12.69 %      | 267 ps  | 0.51 % |
| 8     | 0 °C           | 9.24 ± 1.44 °C         | 2.5 V           | 1    | 17ph | WE | 12.69 %      | 294 ps  | 1.11 % |
| 9     | 0 °C           | 8.00 ± 1.12 °C         | 2.5 V           | 3    | 17ph | NE | 12.62 %      | 576 ps  | 1.02 % |
| 10    | 0 °C           | 8.00 ± 1.12 °C         | 2.5 V           | 3    | 17ph | WE | 12.62 %      | 637 ps  | 2.14 % |
| 11    | 0 °C           | 7.92 ± 1.11 °C         | 2.5 V           | 4    | 17ph | NE | 12.74 %      | 1334 ps | 1.04 % |
| 12    | 0 °C           | 7.92 ± 1.11 °C         | 2.5 V           | 4    | 17ph | WE | 12.76 %      | 1495 ps | 2.17 % |
| 13    | 5 °C           | 13.77 ± 1.35 °C        | 2.5 V           | 1    | 17ph | NE | 12.77 %      | 307 ps  | 0.34 % |
| 14    | 5 °C           | 13.77 ± 1.35 °C        | 2.5 V           | 1    | 17ph | WE | 12.77 %      | 340 ps  | 0.76 % |
| 15    | 5 °C           | 11.82 ± 0.97 °C        | 2.5 V           | 3    | 17ph | NE | 12.66 %      | 575 ps  | 1.01 % |
| 16    | 5 °C           | 11.82 ± 0.97 °C        | 2.5 V           | 3    | 17ph | WE | 12.67 %      | 637 ps  | 2.12 % |
| 17    | 5 °C           | 11.85 ± 0.99 °C        | 2.5 V           | 4    | 17ph | NE | 12.79 %      | 1332 ps | 1.04 % |
| 18    | 5 °C           | 11.85 ± 0.99 °C        | 2.5 V           | 4    | 17ph | WE | 12.80 %      | 1491 ps | 2.17 % |
| 19    | 10 °C          | 16.27 ± 0.95 °C        | 2.5 V           | 4    | 17ph | NE | 12.84 %      | 1326 ps | 1.03 % |
| 20    | 10 °C          | 16.27 ± 0.95 °C        | 2.5 V           | 4    | 17ph | WE | 12.86 %      | 1488 ps | 2.16 % |
| 21    | 15 °C          | 20.49 ± 0.85 °C        | 2.5 V           | 3    | 17ph | NE | 12.72 %      | 563 ps  | 0.94 % |
| 22    | 15 °C          | 20.49 ± 0.85 °C        | 2.5 V           | 3    | 17ph | WE | 12.72 %      | 625 ps  | 2.00 % |
| 23    | 15 °C          | 20.56 ± 0.88 °C        | 2.5 V           | 4    | 17ph | NE | 12.84 %      | 1280 ps | 1.02 % |
| 24    | 15 °C          | 20.56 ± 0.88 °C        | 2.5 V           | 4    | 17ph | WE | 12.85 %      | 1435 ps | 2.16 % |

Table S3: All measurements performed with the mouse-sized scatter phantom. A measurement id is used to identify a specific measurement (meas.). The measurement parameters: source activity (activity), system operating temperature ( $T_{op}$ ) for a cooling temperature of  $T_C = 0^\circ\text{C}$ , trigger scheme (trig), validation scheme (val) and the used energy window (EW) are stated for each evaluation of a measurement. The energy resolution and CRT are stated as FWHM. The prompt rate (prompts), random fraction (randoms), scatter fraction (scatter), trues sensitivity (sens) and NECR are evaluated following the NEMA NU4 standard.

| meas. | activity   | system $T_{op}$               | trig | val  | EW | $\Delta E/E$ | CRT    | prompts     | randoms | scatter | sens   | NECR        |
|-------|------------|-------------------------------|------|------|----|--------------|--------|-------------|---------|---------|--------|-------------|
| 1     | 102.60 MBq | $9.23 \pm 1.35^\circ\text{C}$ | 3    | 28ph | NE | 13.60 %      | 566 ps | 136.18 keps | 2.92 %  | 9.79 %  | 0.12 % | 105.04 keps |
| 2     | 102.60 MBq | $9.23 \pm 1.35^\circ\text{C}$ | 3    | 28ph | WE | 13.64 %      | 618 ps | 276.03 keps | 3.74 %  | 16.66 % | 0.22 % | 179.88 keps |
| 3     | 96.37 MBq  | $9.00 \pm 1.32^\circ\text{C}$ | 3    | 52ph | NE | 13.46 %      | 560 ps | 187.82 keps | 3.58 %  | 9.48 %  | 0.17 % | 144.06 keps |
| 4     | 96.37 MBq  | $9.00 \pm 1.32^\circ\text{C}$ | 3    | 52ph | WE | 13.48 %      | 600 ps | 342.48 keps | 4.30 %  | 15.59 % | 0.29 % | 226.48 keps |
| 5     | 92.40 MBq  | $8.98 \pm 1.32^\circ\text{C}$ | 3    | 37ph | NE | 13.44 %      | 561 ps | 170.55 keps | 3.15 %  | 8.10 %  | 0.16 % | 135.79 keps |
| 6     | 92.40 MBq  | $8.98 \pm 1.32^\circ\text{C}$ | 3    | 37ph | WE | 13.50 %      | 609 ps | 329.22 keps | 3.97 %  | 16.09 % | 0.29 % | 216.54 keps |
| 7     | 88.96 MBq  | $8.97 \pm 1.32^\circ\text{C}$ | 3    | 28ph | NE | 13.43 %      | 563 ps | 137.80 keps | 2.78 %  | 9.13 %  | 0.14 % | 108.11 keps |
| 8     | 88.96 MBq  | $8.97 \pm 1.32^\circ\text{C}$ | 3    | 28ph | WE | 13.46 %      | 615 ps | 278.19 keps | 3.71 %  | 20.39 % | 0.24 % | 165.98 keps |
| 9     | 83.16 MBq  | $9.23 \pm 1.36^\circ\text{C}$ | 2    | 28ph | NE | 13.48 %      | 451 ps | 135.51 keps | 2.29 %  | 8.41 %  | 0.15 % | 108.97 keps |
| 10    | 83.16 MBq  | $9.23 \pm 1.36^\circ\text{C}$ | 2    | 28ph | WE | 13.50 %      | 495 ps | 269.84 keps | 2.97 %  | 17.45 % | 0.26 % | 174.93 keps |
| 11    | 77.32 MBq  | $8.77 \pm 1.28^\circ\text{C}$ | 3    | 52ph | NE | 13.25 %      | 556 ps | 194.38 keps | 2.84 %  | 7.49 %  | 0.23 % | 157.70 keps |
| 12    | 77.32 MBq  | $8.77 \pm 1.28^\circ\text{C}$ | 3    | 52ph | WE | 13.27 %      | 595 ps | 347.76 keps | 3.40 %  | 14.11 % | 0.37 % | 241.72 keps |
| 13    | 75.04 MBq  | $8.65 \pm 1.26^\circ\text{C}$ | 3    | 37ph | NE | 13.24 %      | 557 ps | 179.94 keps | 2.70 %  | 7.88 %  | 0.22 % | 145.19 keps |
| 14    | 75.04 MBq  | $8.65 \pm 1.26^\circ\text{C}$ | 3    | 37ph | WE | 13.26 %      | 602 ps | 340.96 keps | 3.38 %  | 15.79 % | 0.37 % | 228.12 keps |
| 15    | 73.51 MBq  | $8.69 \pm 1.26^\circ\text{C}$ | 2    | 28ph | NE | 13.24 %      | 449 ps | 149.02 keps | 2.15 %  | 9.04 %  | 0.18 % | 118.51 keps |
| 16    | 73.51 MBq  | $8.69 \pm 1.26^\circ\text{C}$ | 2    | 28ph | WE | 13.27 %      | 491 ps | 296.33 keps | 2.78 %  | 18.02 % | 0.32 % | 190.14 keps |
| 17    | 70.70 MBq  | $8.79 \pm 1.29^\circ\text{C}$ | 2    | 37ph | NE | 13.21 %      | 447 ps | 192.42 keps | 2.16 %  | 7.61 %  | 0.25 % | 157.74 keps |

continued on next page



Table S3 – continued from previous page

| meas. | activity  | system $T_{op}$    | trig | val  | EW | $\Delta E/E$ | CRT    | prompts      | randoms | scatter | sens   | NECR         |
|-------|-----------|--------------------|------|------|----|--------------|--------|--------------|---------|---------|--------|--------------|
| 18    | 70.70 MBq | $8.79 \pm 1.29$ °C | 2    | 37ph | WE | 13.24 %      | 485 ps | 363.07 kecps | 2.68 %  | 15.75 % | 0.42 % | 246.12 kecps |
| 19    | 67.99 MBq | $8.69 \pm 1.27$ °C | 3    | 28ph | NE | 13.18 %      | 557 ps | 157.13 kecps | 2.37 %  | 7.82 %  | 0.21 % | 127.71 kecps |
| 20    | 67.99 MBq | $8.69 \pm 1.27$ °C | 3    | 28ph | WE | 13.21 %      | 608 ps | 308.95 kecps | 3.07 %  | 16.90 % | 0.37 % | 202.56 kecps |
| 21    | 66.38 MBq | $8.60 \pm 1.26$ °C | 3    | 52ph | NE | 13.08 %      | 551 ps | 216.94 kecps | 2.42 %  | 7.78 %  | 0.29 % | 176.36 kecps |
| 22    | 66.38 MBq | $8.60 \pm 1.26$ °C | 3    | 52ph | WE | 13.09 %      | 591 ps | 382.48 kecps | 2.86 %  | 13.71 % | 0.48 % | 270.85 kecps |
| 23    | 64.23 MBq | $8.56 \pm 1.25$ °C | 3    | 37ph | NE | 13.10 %      | 555 ps | 204.15 kecps | 2.33 %  | 7.51 %  | 0.29 % | 167.19 kecps |
| 24    | 64.23 MBq | $8.56 \pm 1.25$ °C | 3    | 37ph | WE | 13.13 %      | 599 ps | 382.91 kecps | 2.87 %  | 15.09 % | 0.49 % | 262.72 kecps |
| 25    | 62.17 MBq | $8.62 \pm 1.25$ °C | 2    | 28ph | NE | 13.11 %      | 447 ps | 171.67 kecps | 1.88 %  | 8.42 %  | 0.25 % | 139.03 kecps |
| 26    | 62.17 MBq | $8.62 \pm 1.25$ °C | 2    | 28ph | WE | 13.14 %      | 488 ps | 336.41 kecps | 2.39 %  | 16.73 % | 0.44 % | 224.05 kecps |
| 27    | 59.08 MBq | $8.55 \pm 1.24$ °C | 2    | 37ph | NE | 13.04 %      | 444 ps | 221.02 kecps | 1.78 %  | 6.98 %  | 0.34 % | 184.96 kecps |
| 28    | 59.08 MBq | $8.55 \pm 1.24$ °C | 2    | 37ph | WE | 13.06 %      | 481 ps | 412.23 kecps | 2.20 %  | 15.18 % | 0.58 % | 285.56 kecps |
| 29    | 56.76 MBq | $8.59 \pm 1.25$ °C | 2    | 52ph | NE | 12.98 %      | 440 ps | 229.72 kecps | 1.67 %  | 6.18 %  | 0.37 % | 195.92 kecps |
| 30    | 56.76 MBq | $8.59 \pm 1.25$ °C | 2    | 52ph | WE | 13.00 %      | 473 ps | 401.07 kecps | 2.00 %  | 14.13 % | 0.60 % | 285.64 kecps |
| 31    | 55.02 MBq | $8.48 \pm 1.23$ °C | 3    | 28ph | NE | 13.02 %      | 554 ps | 185.37 kecps | 1.98 %  | 7.67 %  | 0.31 % | 152.28 kecps |
| 32    | 55.02 MBq | $8.48 \pm 1.23$ °C | 3    | 28ph | WE | 13.05 %      | 602 ps | 359.67 kecps | 2.52 %  | 16.38 % | 0.54 % | 240.95 kecps |
| 33    | 52.85 MBq | $8.34 \pm 1.21$ °C | 3    | 37ph | NE | 12.95 %      | 551 ps | 235.52 kecps | 1.86 %  | 6.43 %  | 0.41 % | 199.06 kecps |
| 34    | 52.85 MBq | $8.34 \pm 1.21$ °C | 3    | 37ph | WE | 12.97 %      | 594 ps | 435.97 kecps | 2.30 %  | 14.90 % | 0.69 % | 303.46 kecps |
| 35    | 51.24 MBq | $8.29 \pm 1.20$ °C | 3    | 52ph | NE | 12.89 %      | 545 ps | 233.09 kecps | 1.75 %  | 6.21 %  | 0.42 % | 198.34 kecps |
| 36    | 51.24 MBq | $8.29 \pm 1.20$ °C | 3    | 52ph | WE | 12.90 %      | 582 ps | 406.00 kecps | 2.11 %  | 14.27 % | 0.67 % | 287.71 kecps |
| 37    | 48.90 MBq | $8.42 \pm 1.22$ °C | 2    | 28ph | NE | 12.96 %      | 443 ps | 205.72 kecps | 1.47 %  | 6.89 %  | 0.39 % | 173.49 kecps |
| 38    | 48.90 MBq | $8.42 \pm 1.22$ °C | 2    | 28ph | WE | 12.98 %      | 484 ps | 396.89 kecps | 1.87 %  | 16.80 % | 0.66 % | 266.24 kecps |
| 39    | 47.72 MBq | $8.37 \pm 1.21$ °C | 2    | 37ph | NE | 12.87 %      | 441 ps | 247.20 kecps | 1.40 %  | 6.66 %  | 0.48 % | 209.80 kecps |
| 40    | 47.72 MBq | $8.37 \pm 1.21$ °C | 2    | 37ph | WE | 12.91 %      | 477 ps | 454.80 kecps | 1.71 %  | 15.10 % | 0.80 % | 318.34 kecps |
| 41    | 46.13 MBq | $8.34 \pm 1.21$ °C | 2    | 52ph | NE | 12.82 %      | 438 ps | 222.72 kecps | 1.32 %  | 6.30 %  | 0.45 % | 190.73 kecps |
| 42    | 46.13 MBq | $8.34 \pm 1.21$ °C | 2    | 52ph | WE | 12.84 %      | 471 ps | 385.62 kecps | 1.56 %  | 13.40 % | 0.71 % | 281.45 kecps |
| 43    | 43.91 MBq | $8.38 \pm 1.21$ °C | 2    | 17ph | NE | 12.90 %      | 443 ps | 146.90 kecps | 1.32 %  | 7.19 %  | 0.31 % | 123.44 kecps |
| 44    | 43.91 MBq | $8.38 \pm 1.21$ °C | 2    | 17ph | WE | 12.92 %      | 486 ps | 291.54 kecps | 1.73 %  | 17.31 % | 0.54 % | 193.66 kecps |

continued on next page

Table S3 – continued from previous page

| meas. | activity  | system $T_{op}$    | trig | val  | EW | $\Delta E/E$ | CRT    | prompts      | randoms | scatter | sens   | NECR         |
|-------|-----------|--------------------|------|------|----|--------------|--------|--------------|---------|---------|--------|--------------|
| 45    | 41.28 MBq | $8.29 \pm 1.20$ °C | 3    | 28ph | NE | 12.82 %      | 551 ps | 226.03 kecps | 1.44 %  | 6.78 %  | 0.50 % | 191.21 kecps |
| 46    | 41.28 MBq | $8.29 \pm 1.20$ °C | 3    | 28ph | WE | 12.84 %      | 596 ps | 429.92 kecps | 1.81 %  | 15.73 % | 0.86 % | 296.06 kecps |
| 47    | 39.46 MBq | $8.23 \pm 1.18$ °C | 3    | 37ph | NE | 12.76 %      | 545 ps | 250.26 kecps | 1.32 %  | 6.33 %  | 0.59 % | 214.18 kecps |
| 48    | 39.46 MBq | $8.23 \pm 1.18$ °C | 3    | 37ph | WE | 12.78 %      | 589 ps | 456.30 kecps | 1.61 %  | 14.84 % | 0.97 % | 321.89 kecps |
| 49    | 38.37 MBq | $8.17 \pm 1.17$ °C | 3    | 52ph | NE | 12.73 %      | 542 ps | 197.36 kecps | 1.29 %  | 6.26 %  | 0.48 % | 169.24 kecps |
| 50    | 38.37 MBq | $8.17 \pm 1.17$ °C | 3    | 52ph | WE | 12.75 %      | 579 ps | 339.67 kecps | 1.53 %  | 13.20 % | 0.76 % | 249.16 kecps |
| 51    | 36.74 MBq | $9.37 \pm 1.36$ °C | 1    | 17ph | NE | 13.00 %      | 274 ps | 83.50 kecps  | 1.52 %  | 6.38 %  | 0.21 % | 71.12 kecps  |
| 52    | 36.74 MBq | $9.37 \pm 1.36$ °C | 1    | 17ph | WE | 13.02 %      | 295 ps | 167.90 kecps | 1.95 %  | 17.29 % | 0.37 % | 111.18 kecps |
| 53    | 34.77 MBq | $8.52 \pm 1.28$ °C | 2    | 28ph | NE | 12.76 %      | 440 ps | 236.51 kecps | 0.98 %  | 6.44 %  | 0.63 % | 203.22 kecps |
| 54    | 34.77 MBq | $8.52 \pm 1.28$ °C | 2    | 28ph | WE | 12.78 %      | 479 ps | 445.86 kecps | 1.23 %  | 16.12 % | 1.06 % | 307.22 kecps |
| 55    | 33.51 MBq | $8.26 \pm 1.21$ °C | 2    | 37ph | NE | 12.69 %      | 437 ps | 225.77 kecps | 0.95 %  | 7.63 %  | 0.62 % | 189.28 kecps |
| 56    | 33.51 MBq | $8.26 \pm 1.21$ °C | 2    | 37ph | WE | 12.71 %      | 474 ps | 409.27 kecps | 1.14 %  | 14.96 % | 1.03 % | 290.29 kecps |
| 57    | 32.46 MBq | $8.16 \pm 1.19$ °C | 2    | 52ph | NE | 12.69 %      | 436 ps | 172.74 kecps | 0.91 %  | 6.09 %  | 0.50 % | 149.74 kecps |
| 58    | 32.46 MBq | $8.16 \pm 1.19$ °C | 2    | 52ph | WE | 12.70 %      | 467 ps | 295.73 kecps | 1.08 %  | 13.40 % | 0.78 % | 217.63 kecps |
| 59    | 31.41 MBq | $8.16 \pm 1.17$ °C | 2    | 17ph | NE | 12.71 %      | 440 ps | 184.16 kecps | 0.92 %  | 6.58 %  | 0.54 % | 157.97 kecps |
| 60    | 31.41 MBq | $8.16 \pm 1.17$ °C | 2    | 17ph | WE | 12.73 %      | 482 ps | 358.45 kecps | 1.19 %  | 17.96 % | 0.93 % | 236.57 kecps |
| 61    | 29.79 MBq | $8.09 \pm 1.16$ °C | 3    | 28ph | NE | 12.66 %      | 544 ps | 222.62 kecps | 0.98 %  | 6.49 %  | 0.69 % | 191.12 kecps |
| 62    | 29.79 MBq | $8.09 \pm 1.16$ °C | 3    | 28ph | WE | 12.67 %      | 591 ps | 418.93 kecps | 1.22 %  | 15.40 % | 1.18 % | 293.64 kecps |
| 63    | 29.06 MBq | $8.03 \pm 1.15$ °C | 3    | 37ph | NE | 12.62 %      | 543 ps | 203.13 kecps | 0.96 %  | 6.46 %  | 0.65 % | 174.56 kecps |
| 64    | 29.06 MBq | $8.03 \pm 1.15$ °C | 3    | 37ph | WE | 12.64 %      | 584 ps | 367.40 kecps | 1.16 %  | 14.57 % | 1.07 % | 262.84 kecps |
| 65    | 28.24 MBq | $8.01 \pm 1.14$ °C | 3    | 52ph | NE | 12.61 %      | 540 ps | 155.82 kecps | 0.94 %  | 6.03 %  | 0.51 % | 135.18 kecps |
| 66    | 28.24 MBq | $8.01 \pm 1.14$ °C | 3    | 52ph | WE | 12.63 %      | 577 ps | 265.96 kecps | 1.13 %  | 13.85 % | 0.80 % | 193.59 kecps |
| 67    | 27.13 MBq | $9.12 \pm 1.32$ °C | 1    | 17ph | NE | 12.84 %      | 271 ps | 89.82 kecps  | 1.06 %  | 6.15 %  | 0.31 % | 77.54 kecps  |
| 68    | 27.13 MBq | $9.12 \pm 1.32$ °C | 1    | 17ph | WE | 12.85 %      | 292 ps | 178.30 kecps | 1.36 %  | 16.86 % | 0.54 % | 120.46 kecps |
| 69    | 26.16 MBq | $9.44 \pm 1.42$ °C | 1    | 28ph | NE | 12.83 %      | 271 ps | 96.26 kecps  | 0.89 %  | 6.01 %  | 0.34 % | 83.61 kecps  |
| 70    | 26.16 MBq | $9.44 \pm 1.42$ °C | 1    | 28ph | WE | 12.84 %      | 290 ps | 183.02 kecps | 1.12 %  | 15.80 % | 0.58 % | 127.31 kecps |
| 71    | 23.63 MBq | $8.05 \pm 1.16$ °C | 2    | 28ph | NE | 12.58 %      | 438 ps | 185.62 kecps | 0.66 %  | 8.01 %  | 0.72 % | 155.15 kecps |

continued on next page

Table S3 – continued from previous page

| meas. | activity  | system $T_{op}$    | trig | val  | EW | $\Delta E/E$ | CRT    | prompts      | randoms | scatter | sens   | NECR         |
|-------|-----------|--------------------|------|------|----|--------------|--------|--------------|---------|---------|--------|--------------|
| 72    | 23.63 MBq | $8.05 \pm 1.16$ °C | 2    | 28ph | WE | 12.59 %      | 477 ps | 347.87 kecps | 0.81 %  | 15.38 % | 1.24 % | 245.69 kecps |
| 73    | 22.16 MBq | $8.03 \pm 1.15$ °C | 2    | 37ph | NE | 12.55 %      | 437 ps | 162.77 kecps | 0.61 %  | 6.30 %  | 0.68 % | 141.28 kecps |
| 74    | 22.16 MBq | $8.03 \pm 1.15$ °C | 2    | 37ph | WE | 12.59 %      | 472 ps | 292.57 kecps | 0.74 %  | 14.67 % | 1.12 % | 210.32 kecps |
| 75    | 21.36 MBq | $8.03 \pm 1.15$ °C | 2    | 17ph | NE | 12.57 %      | 437 ps | 171.76 kecps | 0.59 %  | 6.38 %  | 0.75 % | 148.87 kecps |
| 76    | 21.36 MBq | $8.03 \pm 1.15$ °C | 2    | 17ph | WE | 12.59 %      | 479 ps | 330.28 kecps | 0.75 %  | 16.12 % | 1.29 % | 229.42 kecps |
| 77    | 20.60 MBq | $7.95 \pm 1.14$ °C | 3    | 28ph | NE | 12.56 %      | 542 ps | 166.22 kecps | 0.67 %  | 6.52 %  | 0.75 % | 143.42 kecps |
| 78    | 20.60 MBq | $7.95 \pm 1.14$ °C | 3    | 28ph | WE | 12.57 %      | 588 ps | 310.16 kecps | 0.84 %  | 15.30 % | 1.27 % | 219.35 kecps |
| 79    | 19.55 MBq | $7.95 \pm 1.14$ °C | 3    | 37ph | NE | 12.52 %      | 542 ps | 146.88 kecps | 0.64 %  | 6.22 %  | 0.70 % | 127.63 kecps |
| 80    | 19.55 MBq | $7.95 \pm 1.14$ °C | 3    | 37ph | WE | 12.53 %      | 582 ps | 263.01 kecps | 0.79 %  | 14.86 % | 1.14 % | 188.10 kecps |
| 81    | 19.18 MBq | $7.87 \pm 1.12$ °C | 3    | 52ph | NE | 12.52 %      | 539 ps | 112.74 kecps | 0.63 %  | 5.88 %  | 0.55 % | 98.68 kecps  |
| 82    | 19.18 MBq | $7.87 \pm 1.12$ °C | 3    | 52ph | WE | 12.53 %      | 575 ps | 190.69 kecps | 0.76 %  | 13.10 % | 0.86 % | 142.09 kecps |
| 83    | 18.05 MBq | $9.26 \pm 1.40$ °C | 1    | 17ph | NE | 12.72 %      | 270 ps | 66.78 kecps  | 0.70 %  | 6.15 %  | 0.34 % | 58.05 kecps  |
| 84    | 18.05 MBq | $9.26 \pm 1.40$ °C | 1    | 17ph | WE | 12.75 %      | 291 ps | 131.03 kecps | 0.90 %  | 16.58 % | 0.60 % | 89.81 kecps  |
| 85    | 17.52 MBq | $9.32 \pm 1.45$ °C | 1    | 28ph | NE | 12.71 %      | 269 ps | 70.73 kecps  | 0.59 %  | 6.00 %  | 0.38 % | 61.80 kecps  |
| 86    | 17.52 MBq | $9.32 \pm 1.45$ °C | 1    | 28ph | WE | 12.73 %      | 288 ps | 133.32 kecps | 0.74 %  | 15.97 % | 0.64 % | 92.96 kecps  |
| 87    | 13.11 MBq | $7.80 \pm 1.11$ °C | 3    | 28ph | NE | 12.44 %      | 540 ps | 112.35 kecps | 0.43 %  | 6.33 %  | 0.80 % | 97.79 kecps  |
| 88    | 13.11 MBq | $7.80 \pm 1.11$ °C | 3    | 28ph | WE | 12.48 %      | 586 ps | 208.40 kecps | 0.54 %  | 15.46 % | 1.34 % | 147.60 kecps |
| 89    | 12.76 MBq | $7.79 \pm 1.10$ °C | 3    | 37ph | NE | 12.45 %      | 539 ps | 100.80 kecps | 0.42 %  | 6.19 %  | 0.74 % | 88.02 kecps  |
| 90    | 12.76 MBq | $7.79 \pm 1.10$ °C | 3    | 37ph | WE | 12.47 %      | 581 ps | 179.70 kecps | 0.52 %  | 14.83 % | 1.19 % | 129.19 kecps |
| 91    | 12.42 MBq | $7.75 \pm 1.09$ °C | 3    | 52ph | NE | 12.45 %      | 537 ps | 76.50 kecps  | 0.41 %  | 5.95 %  | 0.58 % | 67.14 kecps  |
| 92    | 12.42 MBq | $7.75 \pm 1.09$ °C | 3    | 52ph | WE | 12.46 %      | 574 ps | 128.81 kecps | 0.50 %  | 13.35 % | 0.90 % | 95.89 kecps  |
| 93    | 11.90 MBq | $7.80 \pm 1.10$ °C | 2    | 17ph | NE | 12.44 %      | 436 ps | 104.38 kecps | 0.33 %  | 6.32 %  | 0.82 % | 91.03 kecps  |
| 94    | 11.90 MBq | $7.80 \pm 1.10$ °C | 2    | 17ph | WE | 12.45 %      | 477 ps | 199.32 kecps | 0.42 %  | 16.07 % | 1.40 % | 139.41 kecps |
| 95    | 11.22 MBq | $7.81 \pm 1.11$ °C | 2    | 28ph | NE | 12.43 %      | 435 ps | 97.47 kecps  | 0.31 %  | 6.25 %  | 0.81 % | 85.17 kecps  |
| 96    | 11.22 MBq | $7.81 \pm 1.11$ °C | 2    | 28ph | WE | 12.45 %      | 473 ps | 180.91 kecps | 0.39 %  | 15.33 % | 1.36 % | 128.83 kecps |
| 97    | 10.71 MBq | $8.71 \pm 1.28$ °C | 1    | 17ph | NE | 12.57 %      | 268 ps | 44.42 kecps  | 0.40 %  | 6.12 %  | 0.39 % | 38.86 kecps  |
| 98    | 10.71 MBq | $8.71 \pm 1.28$ °C | 1    | 17ph | WE | 12.56 %      | 289 ps | 86.84 kecps  | 0.53 %  | 17.11 % | 0.67 % | 59.15 kecps  |

continued on next page

Table S3 – continued from previous page

| meas. | activity  | system $T_{op}$    | trig | val  | EW | $\Delta E/E$ | CRT    | prompts      | randoms | scatter | sens   | NECR         |
|-------|-----------|--------------------|------|------|----|--------------|--------|--------------|---------|---------|--------|--------------|
| 99    | 10.48 MBq | $8.91 \pm 1.35$ °C | 1    | 28ph | NE | 12.55 %      | 268 ps | 46.37 kecps  | 0.35 %  | 6.19 %  | 0.41 % | 40.54 kecps  |
| 100   | 10.48 MBq | $8.91 \pm 1.35$ °C | 1    | 28ph | WE | 12.56 %      | 287 ps | 86.98 kecps  | 0.44 %  | 15.58 % | 0.70 % | 61.52 kecps  |
| 101   | 9.17 MBq  | $7.83 \pm 1.12$ °C | 3    | 28ph | NE | 12.41 %      | 540 ps | 80.93 kecps  | 0.30 %  | 6.18 %  | 0.83 % | 70.84 kecps  |
| 102   | 9.17 MBq  | $7.83 \pm 1.12$ °C | 3    | 28ph | WE | 12.42 %      | 586 ps | 149.43 kecps | 0.39 %  | 15.58 % | 1.37 % | 105.80 kecps |
| 103   | 8.82 MBq  | $7.75 \pm 1.11$ °C | 3    | 37ph | NE | 12.40 %      | 539 ps | 71.63 kecps  | 0.29 %  | 6.08 %  | 0.76 % | 62.84 kecps  |
| 104   | 8.82 MBq  | $7.75 \pm 1.11$ °C | 3    | 37ph | WE | 12.42 %      | 581 ps | 127.11 kecps | 0.37 %  | 14.75 % | 1.23 % | 91.80 kecps  |
| 105   | 8.59 MBq  | $7.70 \pm 1.10$ °C | 3    | 52ph | NE | 12.39 %      | 537 ps | 54.36 kecps  | 0.29 %  | 5.87 %  | 0.59 % | 47.91 kecps  |
| 106   | 8.59 MBq  | $7.70 \pm 1.10$ °C | 3    | 52ph | WE | 12.40 %      | 574 ps | 91.15 kecps  | 0.36 %  | 14.05 % | 0.91 % | 66.93 kecps  |
| 107   | 8.32 MBq  | $7.74 \pm 1.10$ °C | 2    | 17ph | NE | 12.39 %      | 435 ps | 74.71 kecps  | 0.23 %  | 6.20 %  | 0.84 % | 65.44 kecps  |
| 108   | 8.32 MBq  | $7.74 \pm 1.10$ °C | 2    | 17ph | WE | 12.41 %      | 476 ps | 142.21 kecps | 0.30 %  | 16.31 % | 1.43 % | 99.09 kecps  |
| 109   | 7.87 MBq  | $7.74 \pm 1.10$ °C | 2    | 28ph | NE | 12.35 %      | 435 ps | 70.10 kecps  | 0.22 %  | 6.28 %  | 0.83 % | 61.31 kecps  |
| 110   | 7.87 MBq  | $7.74 \pm 1.10$ °C | 2    | 28ph | WE | 12.37 %      | 473 ps | 129.66 kecps | 0.28 %  | 15.57 % | 1.39 % | 91.99 kecps  |
| 111   | 6.53 MBq  | $9.86 \pm 1.39$ °C | 1    | 17ph | NE | 12.61 %      | 267 ps | 26.13 kecps  | 0.27 %  | 6.02 %  | 0.37 % | 22.96 kecps  |
| 112   | 6.53 MBq  | $9.86 \pm 1.39$ °C | 1    | 17ph | WE | 12.63 %      | 289 ps | 50.49 kecps  | 0.35 %  | 16.94 % | 0.64 % | 34.63 kecps  |
| 113   | 6.38 MBq  | $9.39 \pm 1.47$ °C | 1    | 28ph | NE | 12.58 %      | 268 ps | 28.56 kecps  | 0.22 %  | 5.68 %  | 0.42 % | 25.30 kecps  |
| 114   | 6.38 MBq  | $9.39 \pm 1.47$ °C | 1    | 28ph | WE | 12.60 %      | 286 ps | 53.13 kecps  | 0.29 %  | 15.54 % | 0.70 % | 37.72 kecps  |
| 115   | 6.17 MBq  | $8.11 \pm 1.26$ °C | 3    | 28ph | NE | 12.39 %      | 540 ps | 56.04 kecps  | 0.21 %  | 6.05 %  | 0.85 % | 49.27 kecps  |
| 116   | 6.17 MBq  | $8.11 \pm 1.26$ °C | 3    | 28ph | WE | 12.40 %      | 585 ps | 102.65 kecps | 0.27 %  | 15.61 % | 1.40 % | 72.78 kecps  |
| 117   | 6.03 MBq  | $7.90 \pm 1.18$ °C | 3    | 37ph | NE | 12.36 %      | 539 ps | 50.01 kecps  | 0.20 %  | 5.93 %  | 0.78 % | 44.09 kecps  |
| 118   | 6.03 MBq  | $7.90 \pm 1.18$ °C | 3    | 37ph | WE | 12.38 %      | 580 ps | 88.34 kecps  | 0.26 %  | 15.80 % | 1.23 % | 62.34 kecps  |
| 119   | 5.86 MBq  | $7.79 \pm 1.14$ °C | 3    | 52ph | NE | 12.36 %      | 536 ps | 37.75 kecps  | 0.20 %  | 5.83 %  | 0.61 % | 33.35 kecps  |
| 120   | 5.86 MBq  | $7.79 \pm 1.14$ °C | 3    | 52ph | WE | 12.38 %      | 572 ps | 62.93 kecps  | 0.25 %  | 13.10 % | 0.93 % | 47.31 kecps  |
| 121   | 5.63 MBq  | $7.77 \pm 1.11$ °C | 2    | 17ph | NE | 12.37 %      | 436 ps | 52.15 kecps  | 0.16 %  | 6.25 %  | 0.87 % | 45.70 kecps  |
| 122   | 5.63 MBq  | $7.77 \pm 1.11$ °C | 2    | 17ph | WE | 12.38 %      | 476 ps | 98.84 kecps  | 0.21 %  | 15.91 % | 1.47 % | 69.64 kecps  |
| 123   | 5.49 MBq  | $7.74 \pm 1.10$ °C | 2    | 28ph | NE | 12.34 %      | 435 ps | 49.72 kecps  | 0.16 %  | 6.27 %  | 0.85 % | 43.55 kecps  |
| 124   | 5.49 MBq  | $7.74 \pm 1.10$ °C | 2    | 28ph | WE | 12.35 %      | 473 ps | 91.81 kecps  | 0.20 %  | 15.33 % | 1.41 % | 65.59 kecps  |
| 125   | 4.81 MBq  | $9.07 \pm 1.41$ °C | 1    | 17ph | NE | 12.52 %      | 268 ps | 20.71 kecps  | 0.19 %  | 5.91 %  | 0.40 % | 18.27 kecps  |

continued on next page

Table S3 – continued from previous page

| meas. | activity | system $T_{op}$    | trig | val  | EW | $\Delta E/E$ | CRT    | prompts     | randoms | scatter | sens   | NECR        |
|-------|----------|--------------------|------|------|----|--------------|--------|-------------|---------|---------|--------|-------------|
| 126   | 4.81 MBq | $9.07 \pm 1.41$ °C | 1    | 17ph | WE | 12.53 %      | 288 ps | 40.02 kecps | 0.26 %  | 16.44 % | 0.69 % | 27.82 kecps |
| 127   | 4.65 MBq | $9.11 \pm 1.44$ °C | 1    | 28ph | NE | 12.52 %      | 268 ps | 21.56 kecps | 0.16 %  | 5.84 %  | 0.44 % | 19.06 kecps |
| 128   | 4.65 MBq | $9.11 \pm 1.44$ °C | 1    | 28ph | WE | 12.52 %      | 286 ps | 40.07 kecps | 0.22 %  | 15.76 % | 0.72 % | 28.33 kecps |
| 129   | 3.63 MBq | $7.22 \pm 1.00$ °C | 3    | 28ph | NE | 12.37 %      | 539 ps | 33.13 kecps | 0.13 %  | 6.23 %  | 0.85 % | 29.06 kecps |
| 130   | 3.63 MBq | $7.22 \pm 1.00$ °C | 3    | 28ph | WE | 12.39 %      | 584 ps | 61.73 kecps | 0.17 %  | 15.34 % | 1.44 % | 44.12 kecps |
| 131   | 3.55 MBq | $7.46 \pm 1.03$ °C | 3    | 37ph | NE | 12.39 %      | 538 ps | 29.71 kecps | 0.13 %  | 6.09 %  | 0.79 % | 26.14 kecps |
| 132   | 3.55 MBq | $7.46 \pm 1.03$ °C | 3    | 37ph | WE | 12.40 %      | 580 ps | 53.02 kecps | 0.17 %  | 14.93 % | 1.27 % | 38.26 kecps |
| 133   | 3.34 MBq | $7.65 \pm 1.08$ °C | 3    | 52ph | NE | 12.39 %      | 536 ps | 21.78 kecps | 0.12 %  | 5.95 %  | 0.61 % | 19.23 kecps |
| 134   | 3.34 MBq | $7.65 \pm 1.08$ °C | 3    | 52ph | WE | 12.41 %      | 573 ps | 36.51 kecps | 0.16 %  | 14.28 % | 0.94 % | 26.75 kecps |
| 135   | 3.21 MBq | $7.68 \pm 1.09$ °C | 2    | 17ph | NE | 12.40 %      | 435 ps | 29.89 kecps | 0.10 %  | 6.10 %  | 0.87 % | 26.31 kecps |
| 136   | 3.21 MBq | $7.68 \pm 1.09$ °C | 2    | 17ph | WE | 12.41 %      | 477 ps | 56.77 kecps | 0.13 %  | 15.81 % | 1.49 % | 40.14 kecps |
| 137   | 3.03 MBq | $7.67 \pm 1.09$ °C | 2    | 28ph | NE | 12.40 %      | 433 ps | 27.99 kecps | 0.09 %  | 6.10 %  | 0.87 % | 24.63 kecps |
| 138   | 3.03 MBq | $7.67 \pm 1.09$ °C | 2    | 28ph | WE | 12.41 %      | 473 ps | 51.70 kecps | 0.13 %  | 15.48 % | 1.44 % | 36.85 kecps |
| 139   | 2.78 MBq | $9.05 \pm 1.43$ °C | 1    | 17ph | NE | 12.56 %      | 267 ps | 12.28 kecps | 0.12 %  | 6.13 %  | 0.41 % | 10.80 kecps |
| 140   | 2.78 MBq | $9.05 \pm 1.43$ °C | 1    | 17ph | WE | 12.57 %      | 288 ps | 23.70 kecps | 0.17 %  | 16.76 % | 0.71 % | 16.38 kecps |
| 141   | 2.63 MBq | $9.13 \pm 1.47$ °C | 1    | 28ph | NE | 12.54 %      | 267 ps | 12.36 kecps | 0.10 %  | 5.68 %  | 0.44 % | 10.98 kecps |
| 142   | 2.63 MBq | $9.13 \pm 1.47$ °C | 1    | 28ph | WE | 12.55 %      | 286 ps | 22.98 kecps | 0.14 %  | 15.43 % | 0.74 % | 16.40 kecps |
| 143   | 2.43 MBq | $7.92 \pm 1.20$ °C | 3    | 28ph | NE | 12.40 %      | 539 ps | 22.59 kecps | 0.09 %  | 6.03 %  | 0.87 % | 19.91 kecps |
| 144   | 2.43 MBq | $7.92 \pm 1.20$ °C | 3    | 28ph | WE | 12.42 %      | 587 ps | 41.50 kecps | 0.13 %  | 15.71 % | 1.44 % | 29.42 kecps |
| 145   | 2.35 MBq | $7.74 \pm 1.14$ °C | 3    | 37ph | NE | 12.39 %      | 538 ps | 19.94 kecps | 0.09 %  | 6.02 %  | 0.80 % | 17.58 kecps |
| 146   | 2.35 MBq | $7.74 \pm 1.14$ °C | 3    | 37ph | WE | 12.41 %      | 581 ps | 35.25 kecps | 0.12 %  | 14.58 % | 1.28 % | 25.66 kecps |
| 147   | 2.23 MBq | $7.68 \pm 1.11$ °C | 3    | 52ph | NE | 12.39 %      | 536 ps | 14.67 kecps | 0.09 %  | 5.95 %  | 0.62 % | 12.95 kecps |
| 148   | 2.23 MBq | $7.68 \pm 1.11$ °C | 3    | 52ph | WE | 12.42 %      | 574 ps | 24.53 kecps | 0.12 %  | 13.48 % | 0.95 % | 18.33 kecps |
| 149   | 2.15 MBq | $7.66 \pm 1.10$ °C | 2    | 17ph | NE | 12.38 %      | 435 ps | 20.51 kecps | 0.07 %  | 6.06 %  | 0.90 % | 18.07 kecps |
| 150   | 2.15 MBq | $7.66 \pm 1.10$ °C | 2    | 17ph | WE | 12.40 %      | 477 ps | 38.92 kecps | 0.10 %  | 16.04 % | 1.52 % | 27.39 kecps |
| 151   | 2.08 MBq | $7.67 \pm 1.10$ °C | 2    | 28ph | NE | 12.37 %      | 434 ps | 19.30 kecps | 0.07 %  | 6.18 %  | 0.87 % | 16.96 kecps |
| 152   | 2.08 MBq | $7.67 \pm 1.10$ °C | 2    | 28ph | WE | 12.39 %      | 474 ps | 35.63 kecps | 0.10 %  | 15.34 % | 1.45 % | 25.49 kecps |

continued on next page

Table S3 – continued from previous page

| meas. | activity | system $T_{op}$    | trig | val  | EW | $\Delta E/E$ | CRT    | prompts     | randoms | scatter | sens   | NECR        |
|-------|----------|--------------------|------|------|----|--------------|--------|-------------|---------|---------|--------|-------------|
| 153   | 1.85 MBq | $9.12 \pm 1.46$ °C | 1    | 17ph | NE | 12.53 %      | 266 ps | 8.20 kecps  | 0.08 %  | 5.78 %  | 0.42 % | 7.27 kecps  |
| 154   | 1.85 MBq | $9.12 \pm 1.46$ °C | 1    | 17ph | WE | 12.56 %      | 288 ps | 15.84 kecps | 0.13 %  | 16.79 % | 0.71 % | 10.94 kecps |
| 155   | 1.59 MBq | $9.12 \pm 1.48$ °C | 1    | 28ph | NE | 12.49 %      | 266 ps | 7.55 kecps  | 0.07 %  | 5.79 %  | 0.45 % | 6.69 kecps  |
| 156   | 1.59 MBq | $9.12 \pm 1.48$ °C | 1    | 28ph | WE | 12.51 %      | 285 ps | 14.02 kecps | 0.10 %  | 15.92 % | 0.74 % | 9.89 kecps  |
| 157   | 1.50 MBq | $7.83 \pm 1.19$ °C | 3    | 28ph | NE | 12.38 %      | 539 ps | 13.95 kecps | 0.06 %  | 6.05 %  | 0.87 % | 12.30 kecps |
| 158   | 1.50 MBq | $7.83 \pm 1.19$ °C | 3    | 28ph | WE | 12.41 %      | 589 ps | 25.72 kecps | 0.10 %  | 15.40 % | 1.45 % | 18.38 kecps |
| 159   | 1.41 MBq | $7.70 \pm 1.11$ °C | 3    | 37ph | NE | 12.36 %      | 537 ps | 12.03 kecps | 0.06 %  | 5.93 %  | 0.80 % | 10.63 kecps |
| 160   | 1.41 MBq | $7.70 \pm 1.11$ °C | 3    | 37ph | WE | 12.41 %      | 582 ps | 21.31 kecps | 0.09 %  | 14.72 % | 1.28 % | 15.47 kecps |
| 161   | 1.36 MBq | $7.65 \pm 1.10$ °C | 3    | 52ph | NE | 12.37 %      | 537 ps | 8.91 kecps  | 0.06 %  | 5.84 %  | 0.62 % | 7.89 kecps  |
| 162   | 1.36 MBq | $7.65 \pm 1.10$ °C | 3    | 52ph | WE | 12.38 %      | 577 ps | 14.92 kecps | 0.09 %  | 13.77 % | 0.95 % | 11.07 kecps |
| 163   | 1.03 MBq | $7.67 \pm 1.10$ °C | 2    | 17ph | NE | 12.37 %      | 434 ps | 9.84 kecps  | 0.04 %  | 6.04 %  | 0.90 % | 8.68 kecps  |
| 164   | 1.03 MBq | $7.67 \pm 1.10$ °C | 2    | 17ph | WE | 12.39 %      | 479 ps | 18.73 kecps | 0.07 %  | 16.12 % | 1.52 % | 13.16 kecps |
| 165   | 0.99 MBq | $7.66 \pm 1.10$ °C | 3    | 28ph | NE | 12.36 %      | 434 ps | 9.28 kecps  | 0.05 %  | 6.15 %  | 0.88 % | 8.16 kecps  |
| 166   | 0.99 MBq | $7.66 \pm 1.10$ °C | 3    | 28ph | WE | 12.40 %      | 475 ps | 17.31 kecps | 0.08 %  | 15.91 % | 1.47 % | 12.23 kecps |
| 167   | 0.92 MBq | $8.86 \pm 1.37$ °C | 1    | 17ph | NE | 12.52 %      | 266 ps | 4.18 kecps  | 0.05 %  | 6.02 %  | 0.43 % | 3.69 kecps  |
| 168   | 0.92 MBq | $8.86 \pm 1.37$ °C | 1    | 17ph | WE | 12.53 %      | 287 ps | 8.09 kecps  | 0.09 %  | 16.32 % | 0.73 % | 5.65 kecps  |
| 169   | 0.88 MBq | $9.00 \pm 1.44$ °C | 1    | 28ph | NE | 12.53 %      | 267 ps | 4.23 kecps  | 0.04 %  | 6.00 %  | 0.45 % | 3.73 kecps  |
| 170   | 0.88 MBq | $9.00 \pm 1.44$ °C | 1    | 28ph | WE | 12.54 %      | 285 ps | 7.86 kecps  | 0.08 %  | 15.86 % | 0.75 % | 5.56 kecps  |
| 171   | 0.80 MBq | $7.79 \pm 1.15$ °C | 3    | 28ph | NE | 12.36 %      | 539 ps | 7.46 kecps  | 0.04 %  | 6.10 %  | 0.88 % | 6.57 kecps  |
| 172   | 0.80 MBq | $7.79 \pm 1.15$ °C | 3    | 28ph | WE | 12.40 %      | 592 ps | 13.77 kecps | 0.07 %  | 15.72 % | 1.45 % | 9.77 kecps  |
| 173   | 0.75 MBq | $7.68 \pm 1.11$ °C | 3    | 37ph | NE | 12.34 %      | 537 ps | 6.44 kecps  | 0.04 %  | 5.98 %  | 0.80 % | 5.69 kecps  |
| 174   | 0.75 MBq | $7.68 \pm 1.11$ °C | 3    | 37ph | WE | 12.43 %      | 586 ps | 11.45 kecps | 0.07 %  | 16.19 % | 1.27 % | 8.03 kecps  |
| 175   | 0.72 MBq | $7.64 \pm 1.09$ °C | 3    | 52ph | NE | 12.37 %      | 536 ps | 4.74 kecps  | 0.04 %  | 5.90 %  | 0.62 % | 4.19 kecps  |
| 176   | 0.72 MBq | $7.64 \pm 1.09$ °C | 3    | 52ph | WE | 12.42 %      | 579 ps | 7.95 kecps  | 0.07 %  | 15.62 % | 0.93 % | 5.65 kecps  |
| 177   | 0.68 MBq | $7.66 \pm 1.10$ °C | 2    | 17ph | NE | 12.35 %      | 433 ps | 6.50 kecps  | 0.03 %  | 6.66 %  | 0.89 % | 5.66 kecps  |
| 178   | 0.68 MBq | $7.66 \pm 1.10$ °C | 2    | 17ph | WE | 12.39 %      | 480 ps | 12.38 kecps | 0.06 %  | 16.48 % | 1.53 % | 8.63 kecps  |
| 179   | 0.64 MBq | $7.66 \pm 1.09$ °C | 2    | 28ph | NE | 12.34 %      | 434 ps | 6.02 kecps  | 0.03 %  | 6.21 %  | 0.87 % | 5.29 kecps  |

continued on next page

Table S3 – continued from previous page

| meas. | activity | system $T_{op}$    | trig | val  | EW | $\Delta E/E$ | CRT    | prompts    | randoms | scatter | sens   | NECR      |
|-------|----------|--------------------|------|------|----|--------------|--------|------------|---------|---------|--------|-----------|
| 180   | 0.64 MBq | $7.66 \pm 1.09$ °C | 2    | 28ph | WE | 12.42 %      | 479 ps | 11.17 kcps | 0.06 %  | 15.69 % | 1.46 % | 7.93 kcps |
| 181   | 0.61 MBq | $7.58 \pm 1.08$ °C | 3    | 28ph | NE | 12.36 %      | 540 ps | 5.70 kcps  | 0.04 %  | 6.24 %  | 0.87 % | 5.01 kcps |
| 182   | 0.61 MBq | $7.58 \pm 1.08$ °C | 3    | 28ph | WE | 12.41 %      | 597 ps | 10.60 kcps | 0.07 %  | 16.18 % | 1.46 % | 7.44 kcps |
| 183   | 0.58 MBq | $7.63 \pm 1.08$ °C | 3    | 37ph | NE | 12.33 %      | 536 ps | 4.95 kcps  | 0.04 %  | 5.94 %  | 0.80 % | 4.38 kcps |
| 184   | 0.58 MBq | $7.63 \pm 1.08$ °C | 3    | 37ph | WE | 12.39 %      | 588 ps | 8.85 kcps  | 0.07 %  | 15.17 % | 1.29 % | 6.36 kcps |
| 185   | 0.55 MBq | $7.63 \pm 1.09$ °C | 3    | 52ph | NE | 12.37 %      | 535 ps | 3.61 kcps  | 0.04 %  | 5.77 %  | 0.62 % | 3.21 kcps |
| 186   | 0.55 MBq | $7.63 \pm 1.09$ °C | 3    | 52ph | WE | 12.43 %      | 578 ps | 6.08 kcps  | 0.07 %  | 14.01 % | 0.95 % | 4.49 kcps |
